# Supplementary material
Source: HighWire-hosted journal article supplement (https://jnm.snmjournals.org/highwire/filestream/94410/field_highwire_adjunct_files/0/102459_Supplemental_Data.pdf)
Supplement: 102459_Supplemental_Data.pdf [file 102459_Supplemental_Data.pdf]

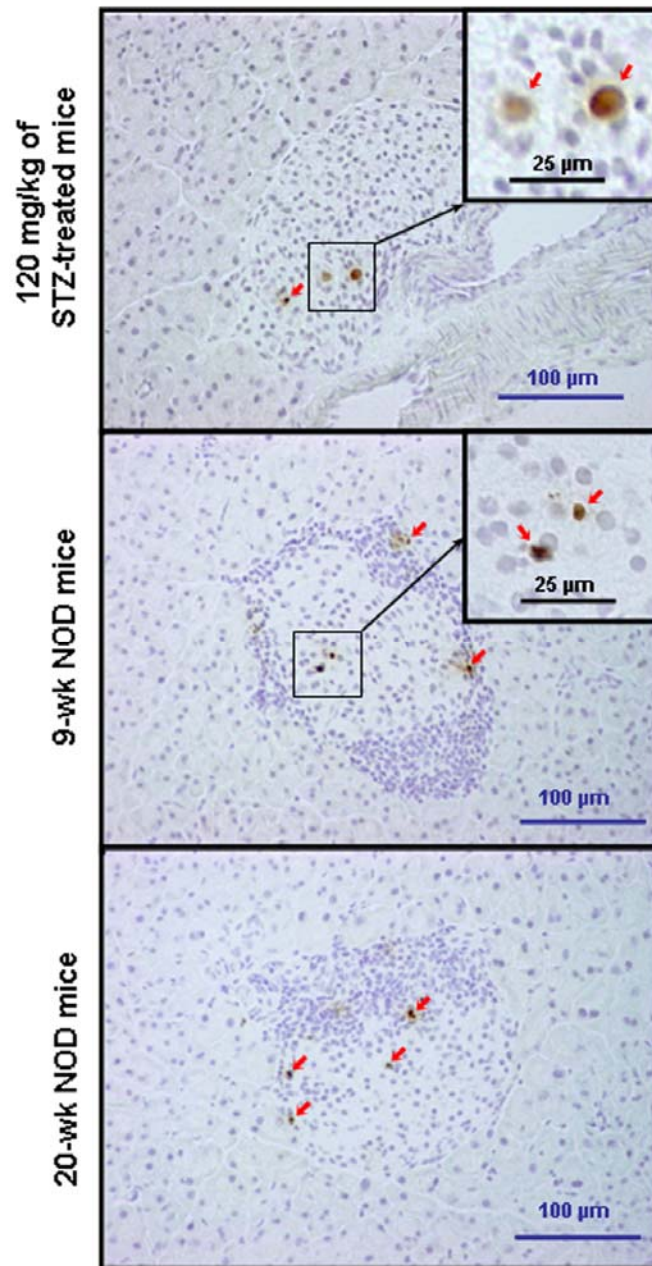

Supplemental Figure 1. TUNEL staining in the pancreas of STZ-treated mice and NOD mice injected with  $^{99m}\text{Tc}$ -annexin A5. Arrows show TUNEL-positive cells. Boxes indicate the magnified areas shown in the insets. Blue scale bars: 100  $\mu\text{m}$ , and black scale bars in inset: 25  $\mu\text{m}$ .

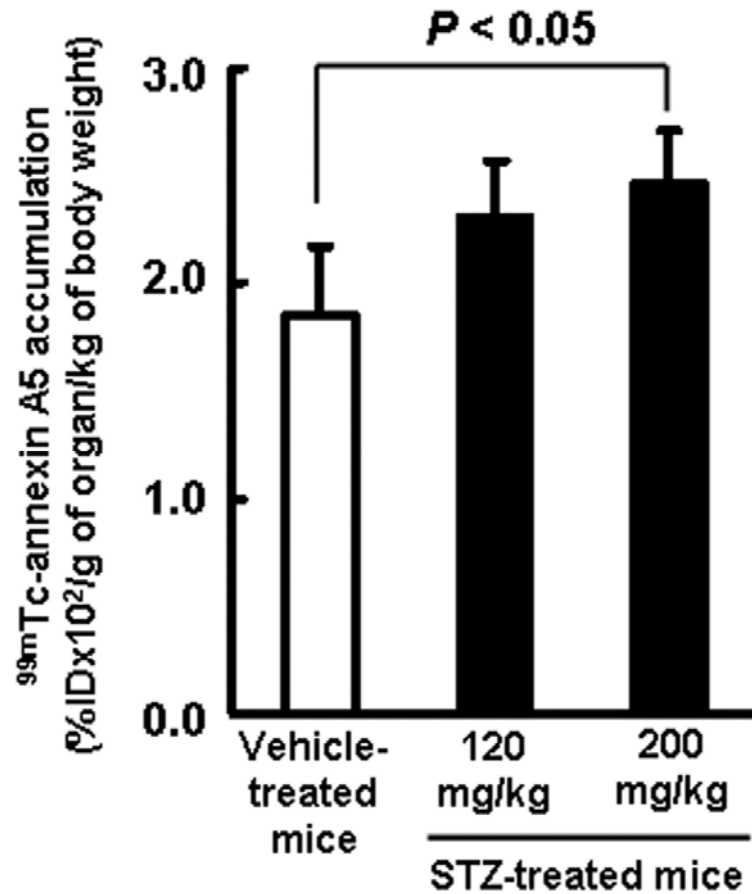

Supplemental Figure 2. Biodistribution of <sup>99m</sup>Tc-annexin A5 in the pancreas of STZ-treated and vehicle-treated mice injected with <sup>99m</sup>Tc-annexin A5. STZ-treated and vehicle-treated mice were injected with <sup>99m</sup>Tc-annexin A5 (3.7 MBq/mouse). Six hours after the <sup>99m</sup>Tc-annexin A5 injection, each pancreas was collected, weighed and measured for radioactivity using a gamma counter. Data represent mean  $\pm$  SD (n=4/group).
